# Supplementary material for: Drug-induced cell viability prediction from LINCS-L1000 through WRFEN-XGBoost algorithm
Source: Springer Nature journal article supplement (doi:10.1186/s12859-020-03949-w), 2021-01-06
Supplement: 12859_2020_3949_MOESM1_ESM.pdf [file 12859_2020_3949_MOESM1_ESM.pdf]

# Drug-induced cell viability prediction from LINC-L1000 through WRFEN-XGBoost algorithm

## Supplementary Material

**Supplementary Table 1**

**The first 15 characteristic genes screened by the WRFEN algorithm**

| Subset Name                 | Number of genes selected | Top 15 key genes selected                                                                           |
|-----------------------------|--------------------------|-----------------------------------------------------------------------------------------------------|
| CTRP-L1000-3h dataset       | 160                      | CDC25A;TSC22D3;ATP1B1;SQSTM1;CTSL;RUVBL1;CPSF4;CDKN1A;CENPE;BLCAP; ICAM1; RRP8; KDM3A; YTHDF1; RRS1 |
| CTRP-L1000-6h dataset       | 193                      | MYC;POLE2;KDM3A;RGS2;BNIP3L;STX1A;TSC22D3;JUN; RRS1;MAT2A;CNPY3;TMEM109;MLEC;JMJD6;NUP62            |
| CTRP-L1000-24h dataset      | 133                      | MRPL12;RGS2;NPC1;POLE2;TOP2A;POP4;PCNA;AURKA; CDH3;RPN1;CDK1;UBE2C;ALDOC;HSPB1;HDAC6                |
| Achilles-L1000-96h dataset  | 252                      | GADD45A;UBE2C;CCNA2;MELK;TSPAN6;SMNDC1;PCNA;RBM34;WDR61;COL4A1;PGM1;ELOVL6;SOX4;TSC22D3; CTSD       |
| Achilles-L1000-120h dataset | 322                      | BIRC5;NFKBIA;DUSP4;CDK1;POLE2;SPDEF;TRIB1;INSIG1;FOXO4;CTSL;SMARCD2;FOXO3;BNIP3;PLS1;IGFBP3         |
| Achilles-L1000-144h dataset | 350                      | TES;IER3;CTSL;GNAS;PSMG1;ABCF3;SPAG4;B4GAT1;GLRX;TIMM22;CENPE;ABCC5;JMJD6;HOXA10;NCK1               |

**Supplementary Table 2**

**XGBoost default parameters and best parameter combinations (Achilles-L1000 Series Model)**

| Parameter Name   | L1000-Achilles-96h | L1000-Achilles-120h | L1000-Achilles-144h |
|------------------|--------------------|---------------------|---------------------|
| learning rate    | 0.0100             | 0.0100              | 0.0225              |
| gamma            | 0.2540             | 0                   | 1.6190              |
| max depth        | 6                  | 6                   | 7                   |
| min child weight | 3                  | 5                   | 8                   |
| subsample        | 0.7014             | 0.5914              | 0.6071              |
| colsample_bytree | 0.9524             | 0.9048              | 0.3333              |
| lambda           | 0.7365             | 0.5786              | 1.7157              |
| Iteration times  | 4809               | 2984                | 3857                |

**Supplementary Table 3****Comparison of the algorithm in this paper with other algorithms (Pearson correlation)**

| The screen used     | This study | PCA-Lasso | PCA-SVR | FTest-RF | MI-KNN | VAE    | DAE-NN |
|---------------------|------------|-----------|---------|----------|--------|--------|--------|
| CTRP-L1000-3h(S2)   | 0.8392     | 0.7291    | 0.7166  | 0.7392   | 0.7791 | 0.7775 | 0.6789 |
| CTRP-L1000-6h(S2)   | 0.6770     | 0.5985    | 0.5962  | 0.6343   | 0.6105 | 0.6812 | 0.6273 |
| CTRP-L1000-24h(S2)  | 0.8859     | 0.8208    | 0.8176  | 0.8534   | 0.8706 | 0.8788 | 0.8660 |
| CTRP-L1000-3h(S1)   | 0.7705     | 0.7210    | 0.7242  | 0.6488   | 0.7189 | 0.6981 | 0.6298 |
| CTRP-L1000-6h(S1)   | 0.6239     | 0.5507    | 0.5545  | 0.5588   | 0.4991 | 0.5820 | 0.5105 |
| CTRP-L1000-24h(S1)  | 0.8321     | 0.7887    | 0.7900  | 0.7942   | 0.8054 | 0.8289 | 0.8033 |
| Achilles-L1000-96h  | 0.5893     | 0.5392    | 0.5266  | 0.5215   | 0.4334 | 0.5864 | 0.5045 |
| Achilles-L1000-120h | 0.5275     | 0.5036    | 0.5000  | 0.4800   | 0.3328 | 0.4643 | 0.4592 |
| Achilles-L1000-144h | 0.5348     | 0.5176    | 0.4975  | 0.4699   | 0.4066 | 0.5074 | 0.4822 |

**Supplementary Table 4****Comparison of the algorithm in this paper with other algorithms ( $R^2$ )**

| The screen used     | This study | PCA-Lasso | PCA-SVR | FTest-RF | MI-KNN | VAE    | DAE-NN |
|---------------------|------------|-----------|---------|----------|--------|--------|--------|
| CTRP-L1000-3h(S2)   | 0.6884     | 0.5179    | 0.5040  | 0.5362   | 0.5781 | 0.6043 | 0.4058 |
| CTRP-L1000-6h(S2)   | 0.4578     | 0.3582    | 0.3423  | 0.3969   | 0.3148 | 0.4497 | 0.3692 |
| CTRP-L1000-24h(S2)  | 0.7847     | 0.6736    | 0.6675  | 0.7262   | 0.7543 | 0.7660 | 0.7453 |
| CTRP-L1000-3h(S1)   | 0.5803     | 0.5137    | 0.5153  | 0.4191   | 0.4828 | 0.4845 | 0.3557 |
| CTRP-L1000-6h(S1)   | 0.3884     | 0.3012    | 0.2927  | 0.3098   | 0.1566 | 0.3137 | 0.1522 |
| CTRP-L1000-24h(S1)  | 0.6922     | 0.6211    | 0.6211  | 0.6304   | 0.6414 | 0.6823 | 0.6174 |
| Achilles-L1000-96h  | 0.3468     | 0.2905    | 0.2682  | 0.2684   | 0.1068 | 0.3224 | 0.2499 |
| Achilles-L1000-120h | 0.2782     | 0.2496    | 0.2379  | 0.2236   | 0.0240 | 0.1869 | 0.1736 |
| Achilles-L1000-144h | 0.2848     | 0.2657    | 0.2350  | 0.2176   | 0.1133 | 0.2460 | 0.2169 |

**Supplementary Table 5****Comparison of the algorithm in this paper with other algorithms (Mean squared error)**

| The screen used     | This study | PCA-Lasso | PCA-SVR | FTest-RF | MI-KNN | VAE   | DAE-NN |
|---------------------|------------|-----------|---------|----------|--------|-------|--------|
| CTRP-L1000-3h(S2)   | 0.021      | 0.033     | 0.034   | 0.032    | 0.029  | 0.027 | 0.041  |
| CTRP-L1000-6h(S2)   | 0.054      | 0.064     | 0.066   | 0.060    | 0.069  | 0.055 | 0.063  |
| CTRP-L1000-24h(S2)  | 0.018      | 0.027     | 0.027   | 0.023    | 0.020  | 0.019 | 0.021  |
| CTRP-L1000-3h(S1)   | 0.029      | 0.033     | 0.033   | 0.040    | 0.035  | 0.035 | 0.044  |
| CTRP-L1000-6h(S1)   | 0.064      | 0.073     | 0.074   | 0.072    | 0.088  | 0.071 | 0.088  |
| CTRP-L1000-24h(S1)  | 0.025      | 0.031     | 0.031   | 0.030    | 0.030  | 0.026 | 0.032  |
| Achilles-L1000-96h  | 1.477      | 1.604     | 1.655   | 1.654    | 2.019  | 1.532 | 1.696  |
| Achilles-L1000-120h | 1.391      | 1.446     | 1.468   | 1.496    | 1.880  | 1.567 | 1.592  |
| Achilles-L1000-144h | 1.307      | 1.342     | 1.398   | 1.429    | 1.620  | 1.378 | 1.431  |

**Input:** Training Sample *PertDT* –  $S_{N \times M}$ , Number of decision trees *TreeNum*.

**Algorithm execution process:**

1. In the training sample *PertDT-S*, for each differential expressed gene  $g \in OriDEGs$ :

1.1 For each decision tree  $t$ :

1.1.1 Bootstrap the training sample and then form the subset **Sample\***.

1.1.2 Construct a decision tree  $DecisionTree_t$  by using **Sample\***.

1.1.3 Use the validation data to predict the results on  $DecisionTree_t$  and the Pearson correlation coefficient is used to evaluate the prediction performance, which are recorded as the original error  $error_t$ .

1.1.4 Add random noise to each gene  $g$ , and use Pearson correlation coefficient to evaluate the prediction performance, which are recorded as  $ERROR_{tg}$ .

1.1.5 Compute the importance value on  $DecisionTree_t$  under gene  $g$ .

$$difference_{tg} = ERROR_{tg} - error_t \quad (Formula S1)$$

End For.

1.2 Obtain the average of all decision trees results under gene  $g$ :

$$d_g^{\wedge} = \frac{1}{TreeNum} * \sum_{t=1}^{TreeNum} difference_{tg} \quad (Formula S2)$$

1.3 Obtain the variance of all decision trees results under gene  $g$ :

$$Var_g^2 = \frac{1}{TreeNum - 1} * \sum_{t=1}^{TreeNum} (difference_{tg} - d_g^{\wedge})^2 \quad (Formula S3)$$

1.4 Calculate the importance of gene  $g$ :

$$importance_g = \frac{d_g^{\wedge}}{Var_g^2} \quad (Formula S4)$$

End for.

2. In the training sample *PertDT-S*, for each parameter combination of  $\alpha$ (the coefficient penalty) and  $\lambda$ (the ratio of the lasso penalty):

2.1 Train the ElasticNet model under the specified parameter settings in the training sample *PertDT-S*.

2.2 Use the validation data to predict the results on the ElasticNet and calculate the Pearson correlation coefficient to evaluate the prediction performance.

2.3 Select the model with the highest Pearson correlation coefficient, and get the feature genes importance according to their weight coefficient.

End for.

3. Calculate the feature importance according to Formula 2.

**Output:** The final feature importance.

Supplementary Figure 1  
The flowchart of feature selection

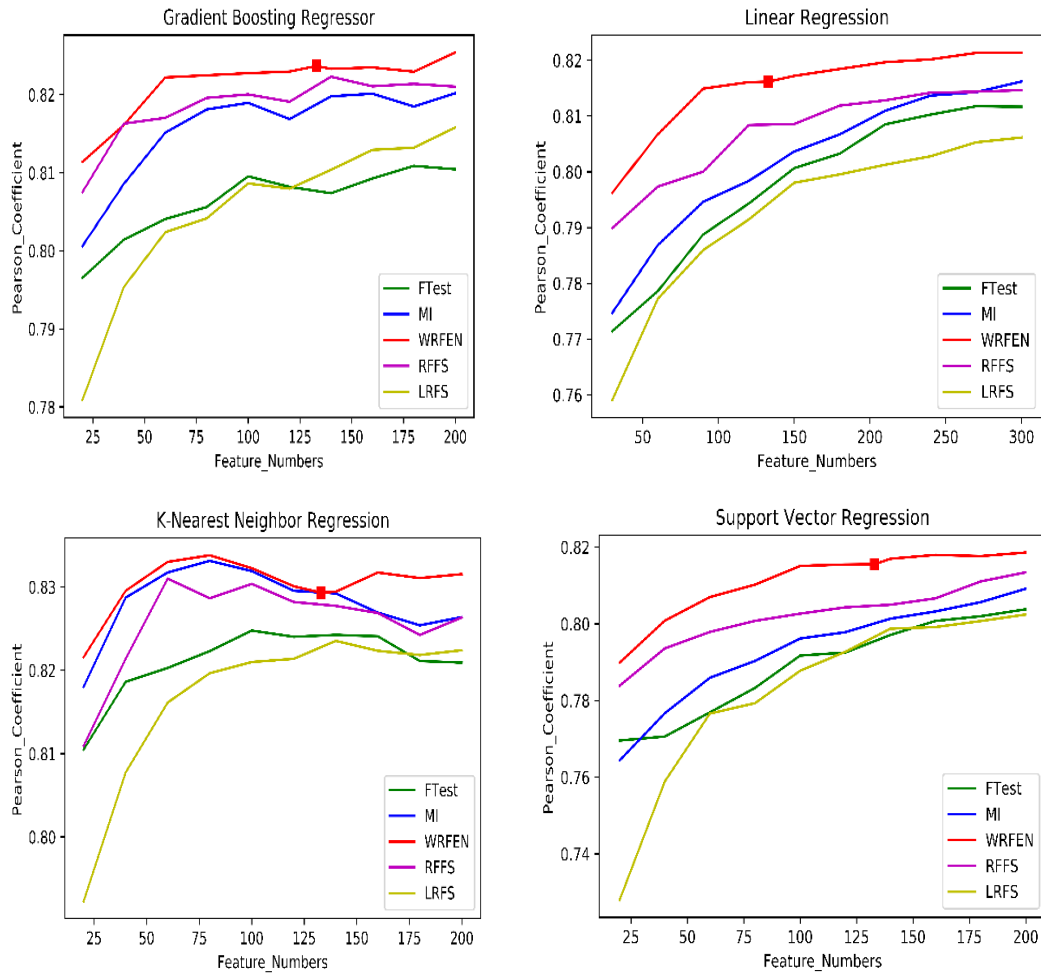

Supplementary Figure 2

Comparison of different key gene selection methods. “Ftest” refers to the joint hypotheses test. “MI” refers to mutual information. “WRFEN” refers to the method this study used. “RFFS” means using the Random Forest algorithm to select the key genes. “LRFS” means using the Linear Regression Model to select the key genes.

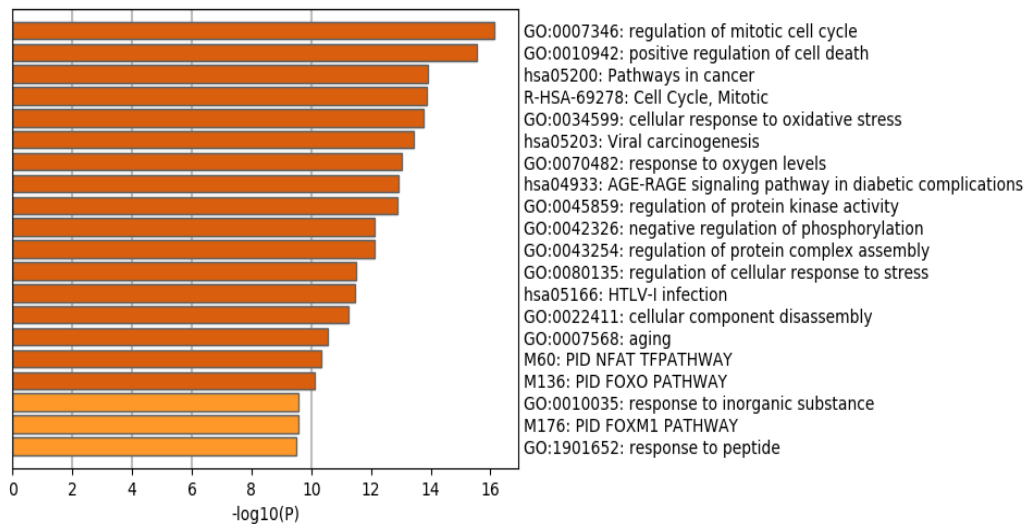

Supplementary Figure 3

Enrichment analysis of differentially expressed genes in the Achilles-L1000-96h dataset

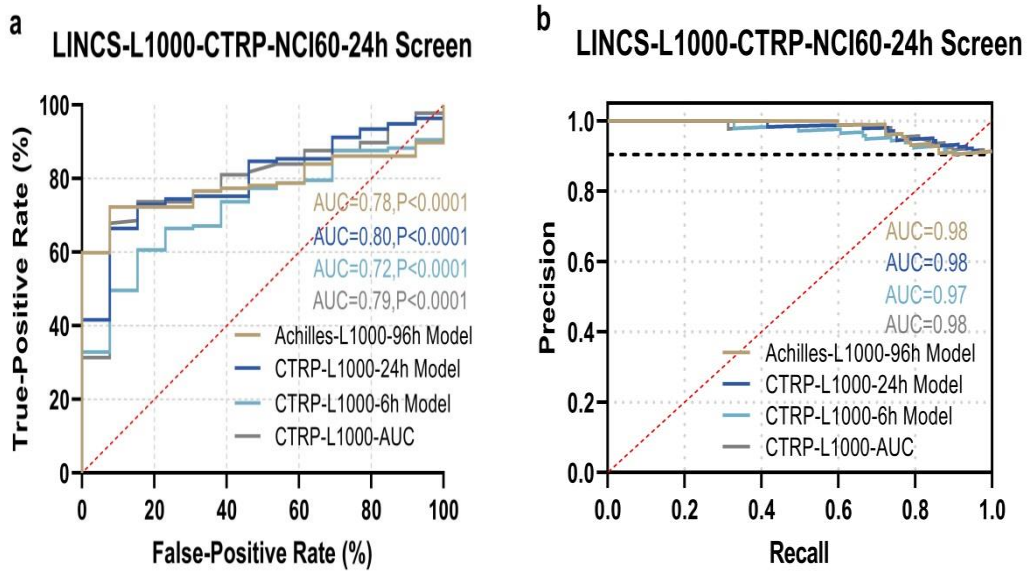

Supplementary Figure 4

ROC curve (a) and PR curve (b) of the model evaluation on LINCS-L1000-CTRP-NCI60-24h dataset

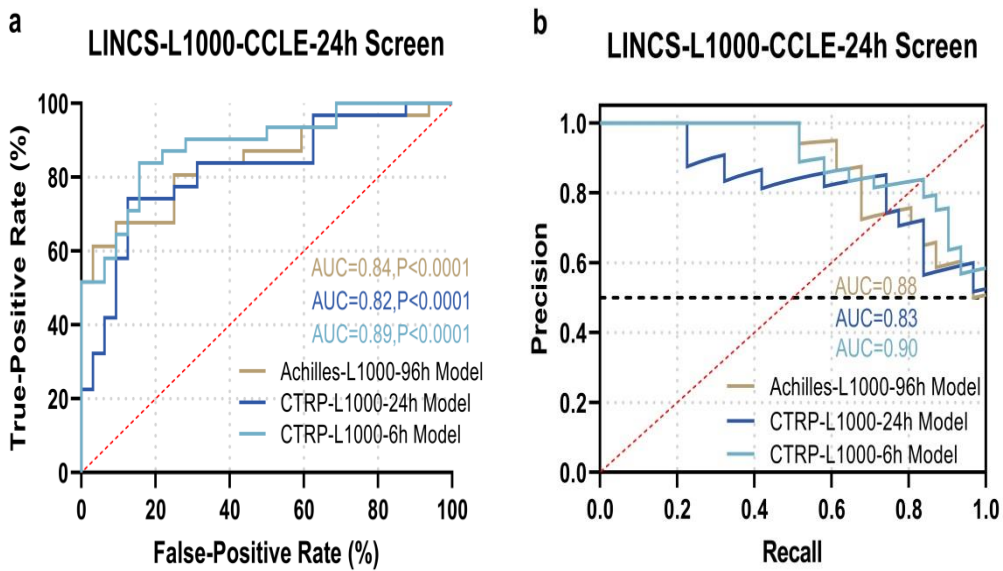

Supplementary Figure 5

ROC curve (a) and PR curve (b) of the model evaluation on LINCS-L1000-CCLE-24h dataset

# LINCS-L1000-CCLE-24h Screen (L1000-CTRP-24h Model)

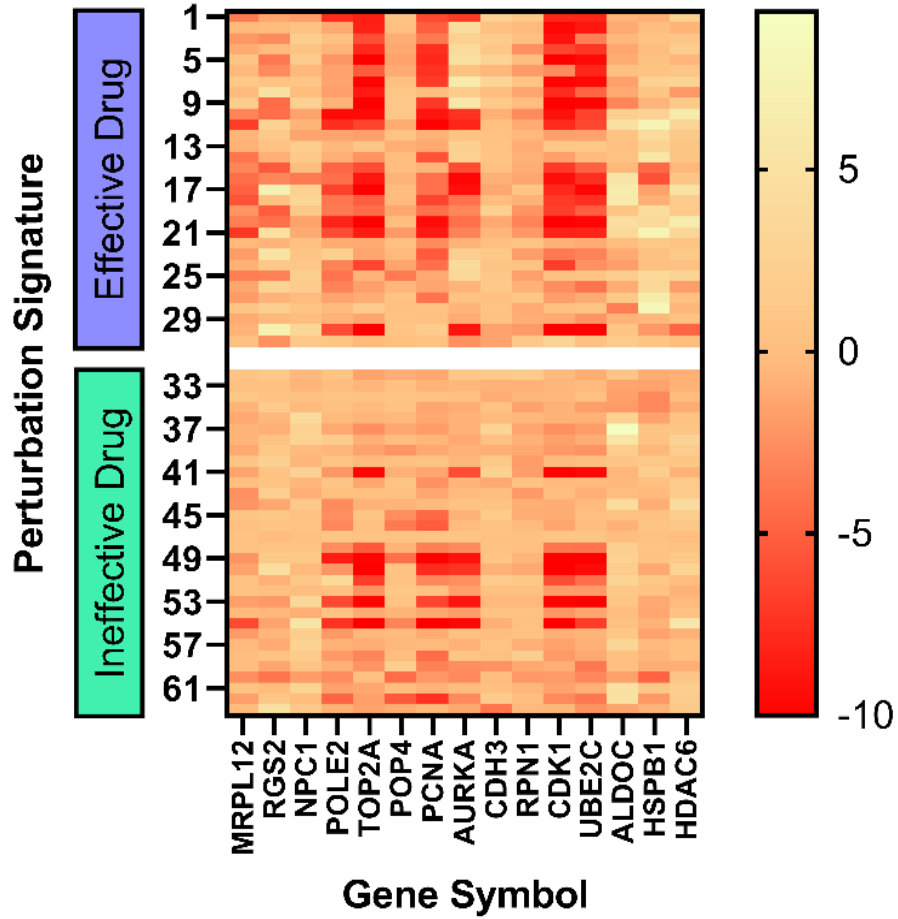

Supplementary Figure 6

Heat map of the first 15 genes of the LINCS-L1000-CCLE-24h dataset
